# Supplementary material for: Efficient Fe3O4 nanoparticle catalysts for depolymerization of polyethylene terephthalate
Source: Royal Society of Chemistry journal article supplement (doi:10.1039/d3gc01707a), 2023-01-01
Supplement: d3gc01707a1.pdf [file d3gc01707a1.pdf]

# Electronic Supplementary Information

## **Title: Efficient Fe<sub>3</sub>O<sub>4</sub> Nanoparticle Catalysts for Depolymerization of Polyethylene Terephthalate**

Yoonjeong Jo,<sup>a</sup> Eun Jeong Kim,<sup>a</sup> Jueun Kim<sup>a</sup> and Kwangjin An<sup>\*a</sup>

<sup>a</sup> School of Energy and Chemical Engineering, and Graduate School of Carbon Neutrality, Ulsan National Institute of Science and Technology (UNIST), Ulsan 44919, Republic of Korea

\* To whom correspondence should be addressed (E-mail: [kjan@unist.ac.kr](mailto:kjan@unist.ac.kr))

**RECEIVED DATE**

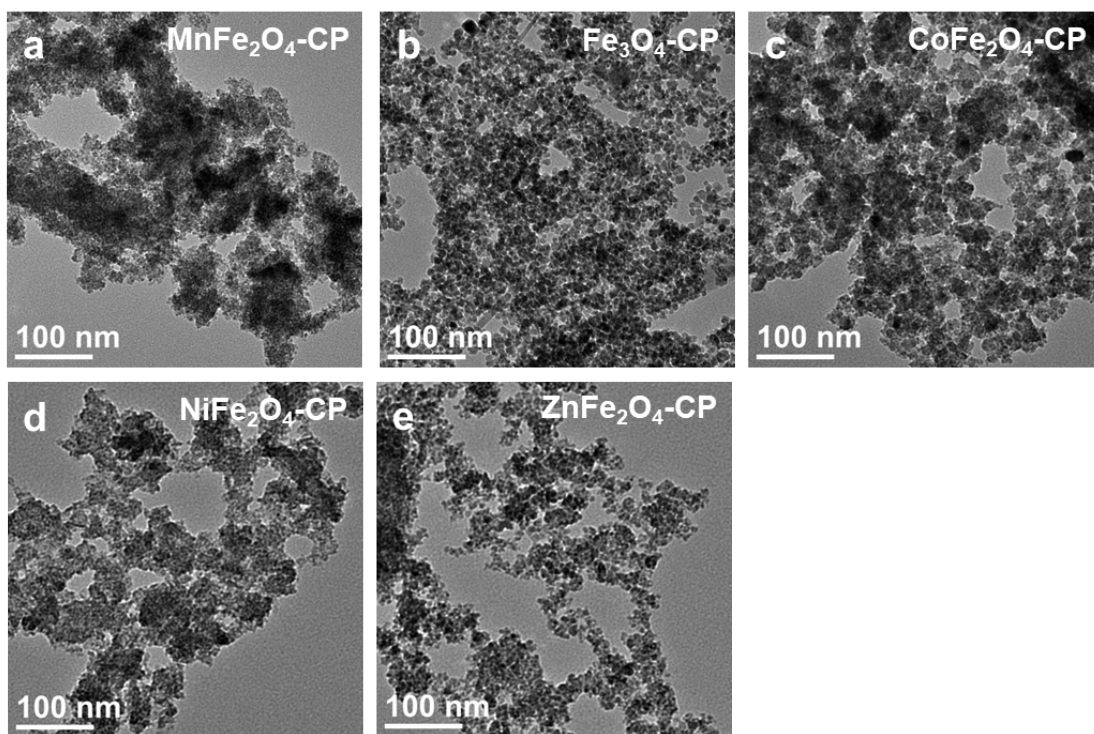

**Fig. S1.** TEM images of Fe<sub>3</sub>O<sub>4</sub> prepared by various synthesis methods. (a) MnFe<sub>2</sub>O<sub>4</sub>-CP, (b) Fe<sub>3</sub>O<sub>4</sub>-CP, (c) CoFe<sub>2</sub>O<sub>4</sub>-CP, (d) NiFe<sub>2</sub>O<sub>4</sub>-CP, and (e) ZnFe<sub>2</sub>O<sub>4</sub>-CP.

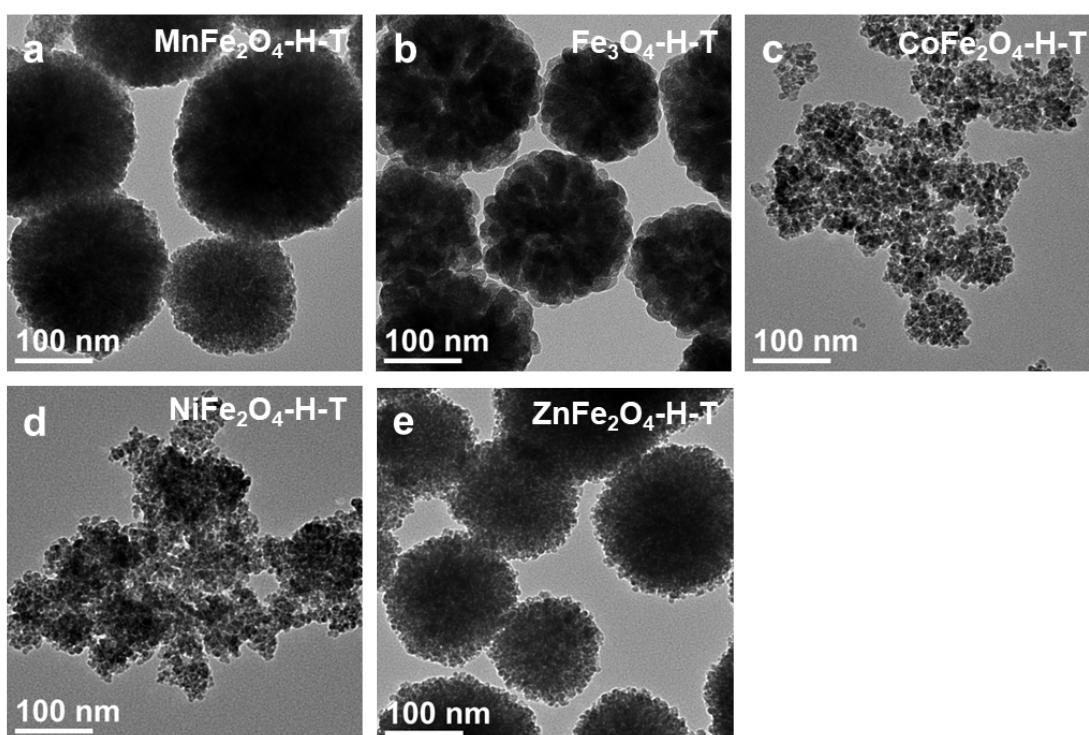

**Fig. S2.** TEM images of Fe<sub>3</sub>O<sub>4</sub> prepared by various synthesis methods. (a) MnFe<sub>2</sub>O<sub>4</sub>-H-T, (b) Fe<sub>3</sub>O<sub>4</sub>-H-T, (c) CoFe<sub>2</sub>O<sub>4</sub>-H-T, (d) NiFe<sub>2</sub>O<sub>4</sub>-H-T, and (e) ZnFe<sub>2</sub>O<sub>4</sub>-H-T.

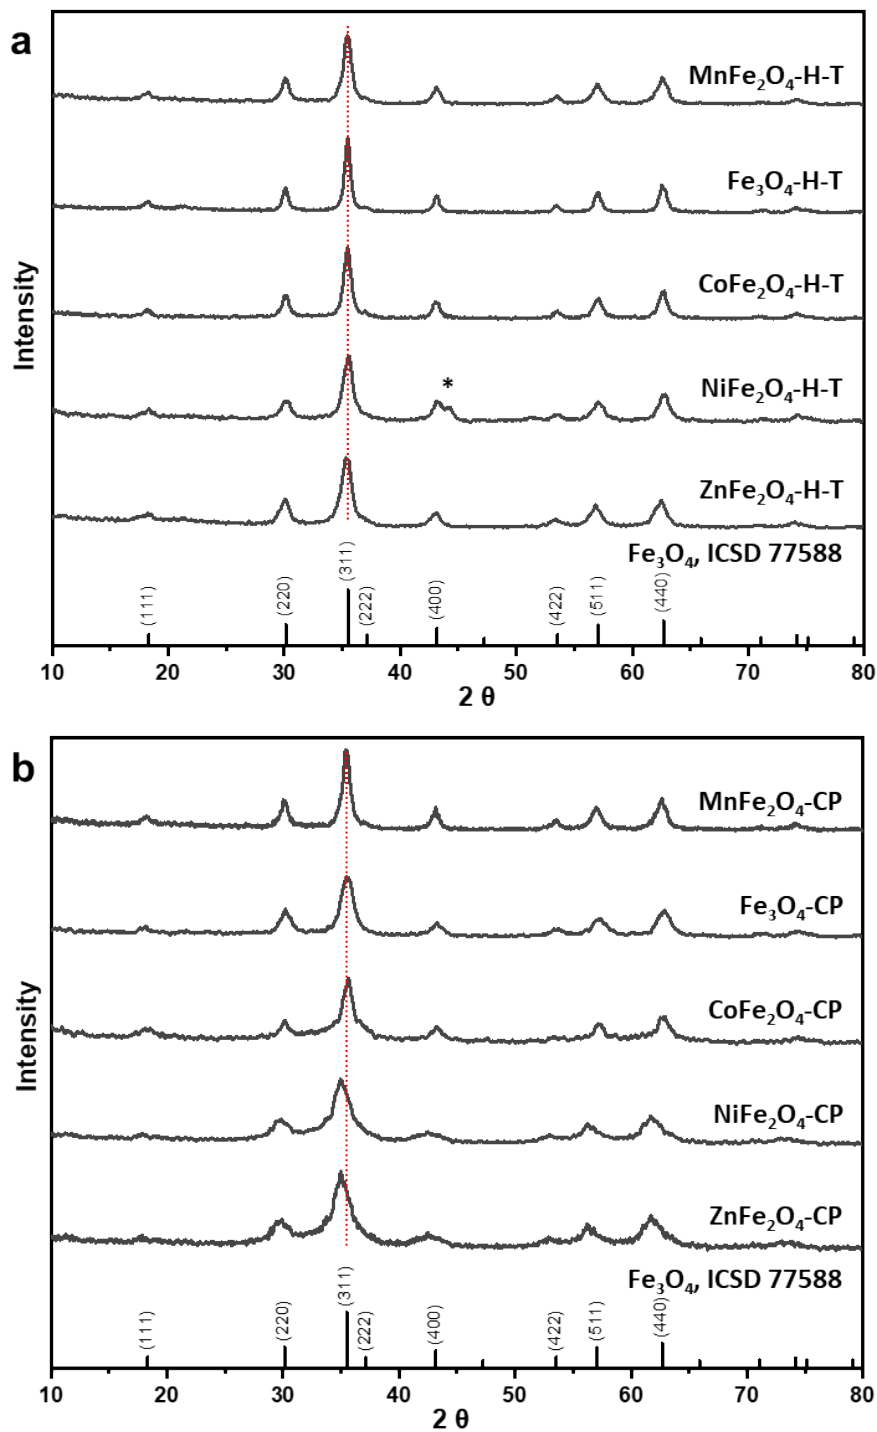

**Fig. S3.** XRD patterns of  $M\text{Fe}_2\text{O}_4$ ,  $M=\text{Mn, Fe, Co, Ni, and Zn}$  (a) catalysts prepared by the H method using Triton X-100, and (b) catalysts prepared by the CP method. Asterisks indicate peaks corresponding to metallic Ni (ICSD number 53807).

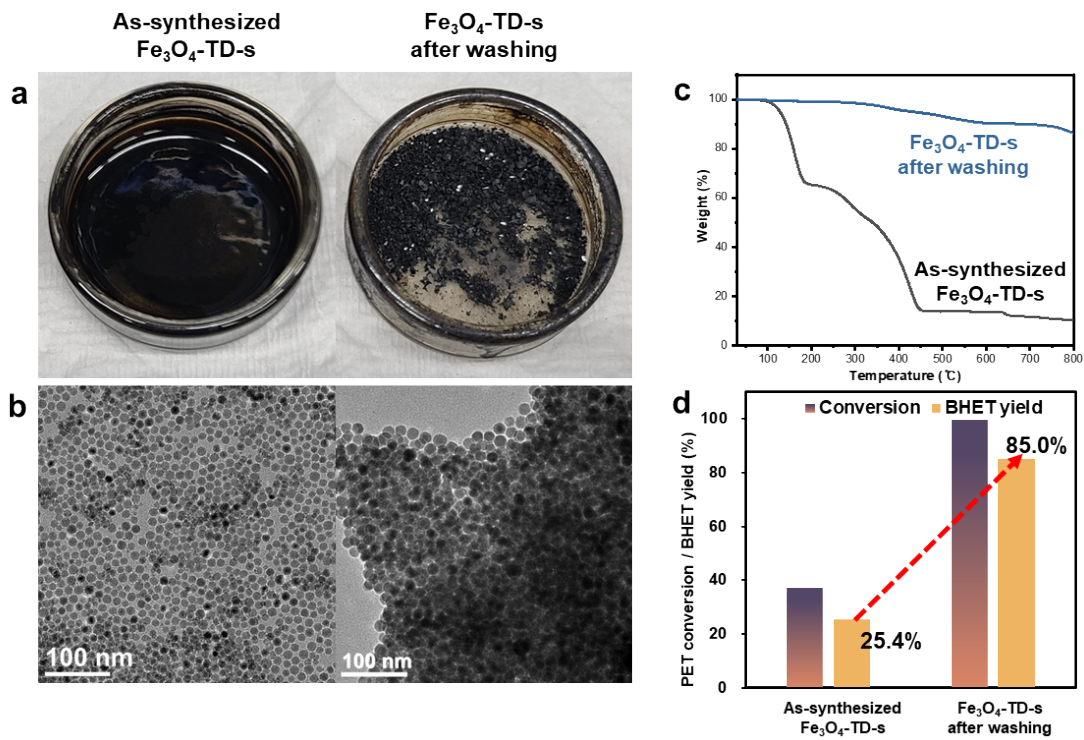

**Fig. S4.** Effect of surfactant removal on  $\text{Fe}_3\text{O}_4$ -TD-s NPs. (a) Photographs of waxy (left) and fine powder (right) forms of  $\text{Fe}_3\text{O}_4$ -TD-s NPs before and after the washing process. (b) TEM images, and (c) TGA curves of as-synthesized (left) and heavily washed (right)  $\text{Fe}_3\text{O}_4$ -TD-s NPs. (d) Changes in PET conversion and BHET yield.

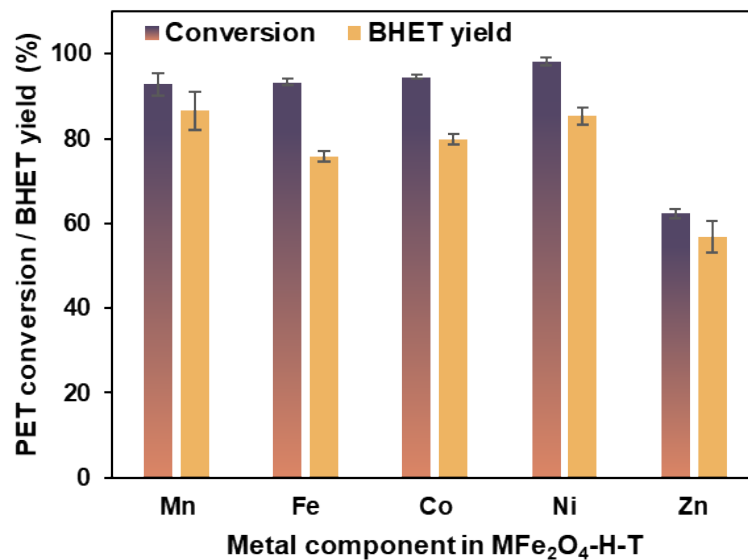

**Fig. S5.** Catalytic performance of PET glycolysis over mixed ferrite ( $\text{MFe}_2\text{O}_4$ -H-T) NPs.

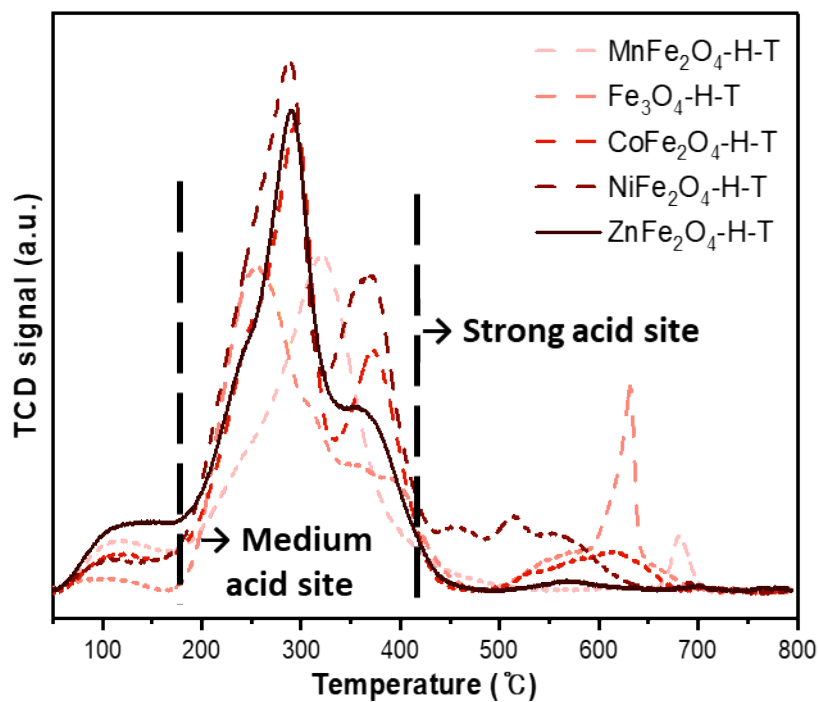

**Fig. S6.** Temperature-programmed desorption (TPD) profiles by ammonia for MnFe<sub>2</sub>O<sub>4</sub>-H-T NPs.

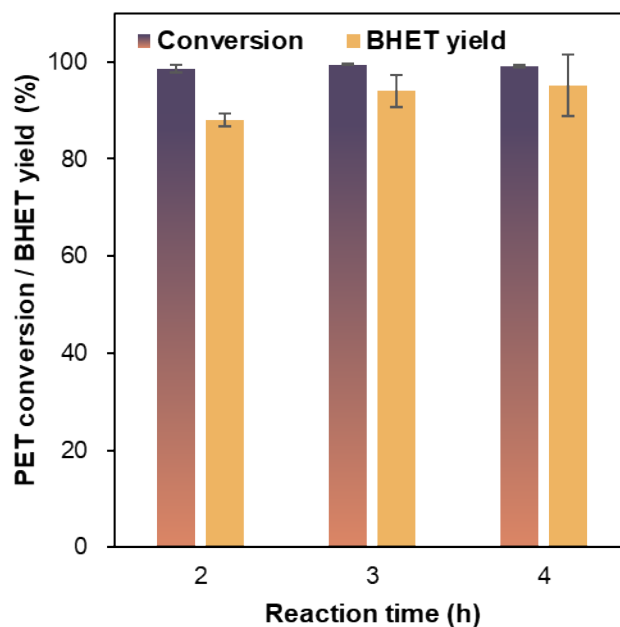

**Fig. S7.** Effect of reaction time in PET glycolysis. Reaction conditions: PET 1 g, EG 3 mL, catalyst 0.01 g, and reaction temperature 195°C.

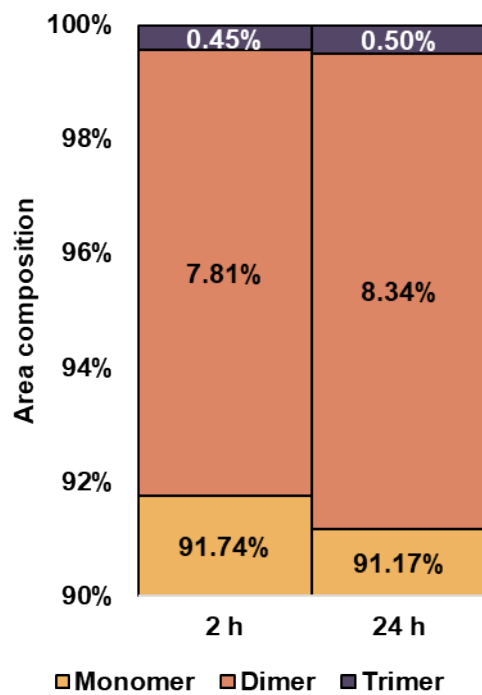

**Fig. S8.** Product distribution of BHET as a function of glycolysis reaction time by HPLC analysis.

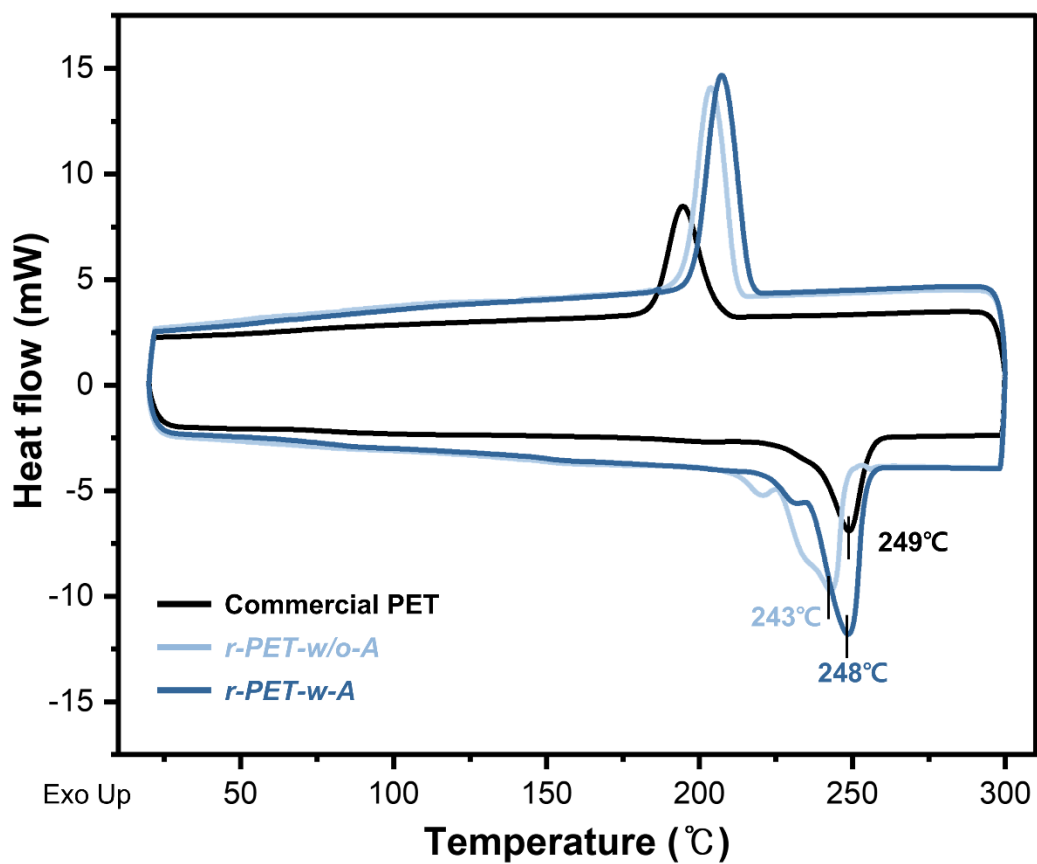

Fig. S9. DSC curves of three kinds of PETs: Commercial PET, *r*-PET-w/o-A, and *r*-PET-w/o-A.

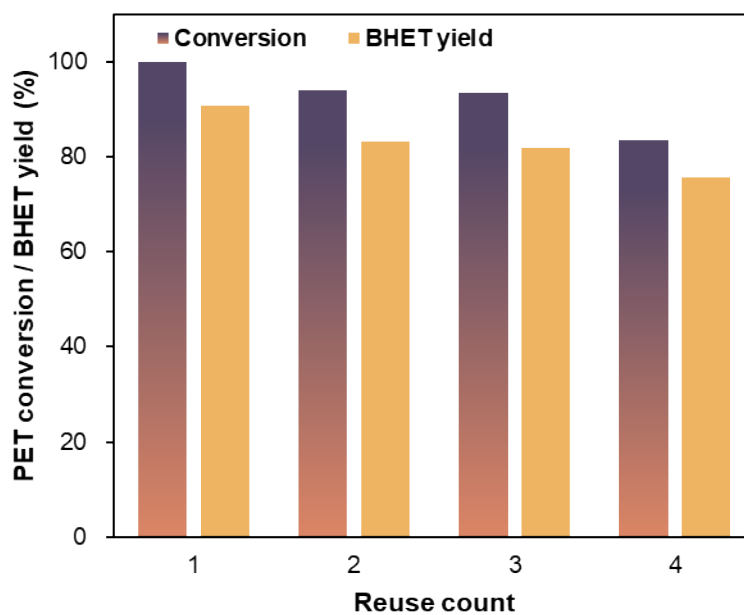

Fig. S10. Reusability test of Fe<sub>3</sub>O<sub>4</sub>-CP NPs in PET glycolysis.

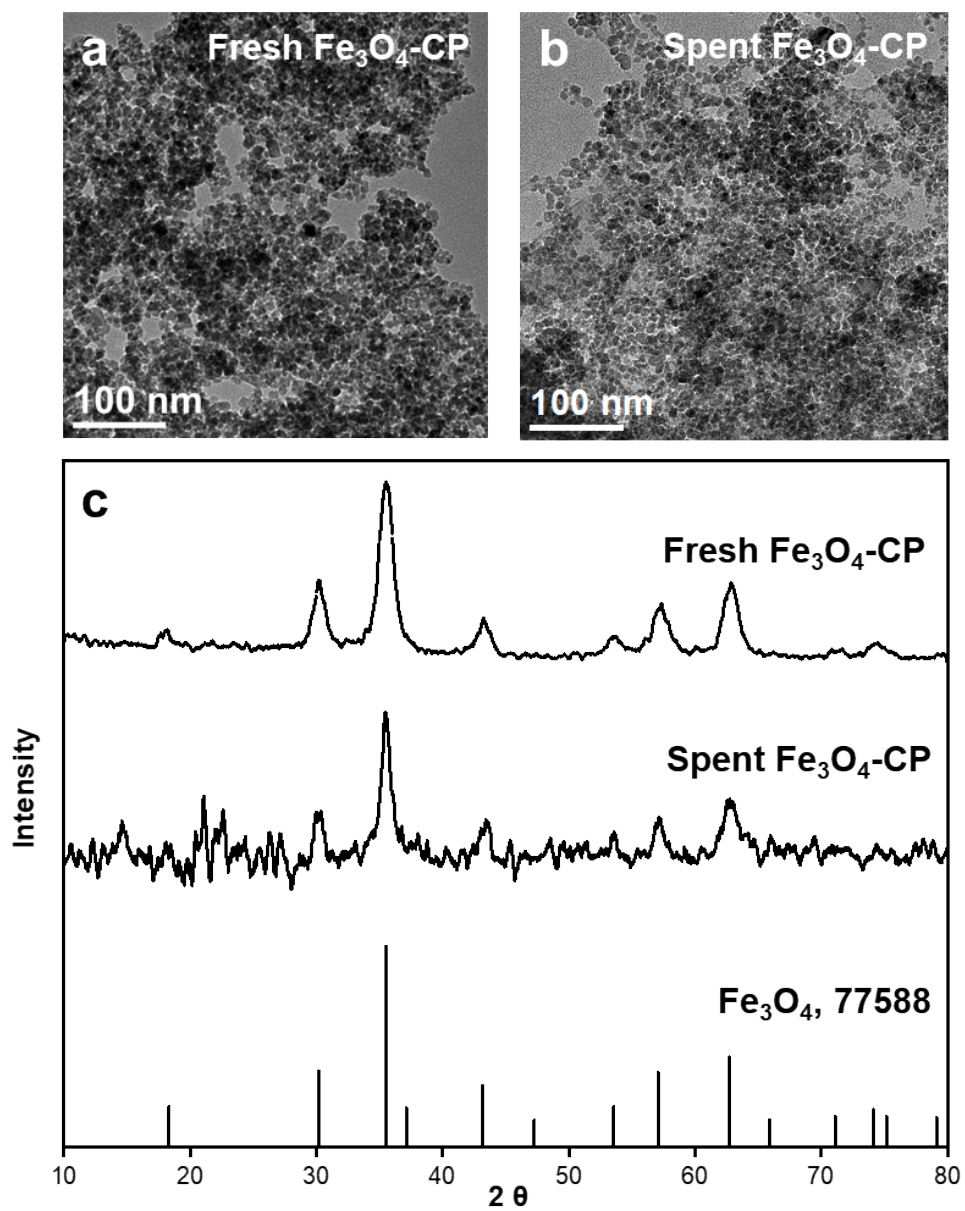

**Fig. S11.** (a,b) TEM images and (c) XRD patterns of the fresh and spent  $\text{Fe}_3\text{O}_4$ -CP NP catalysts after reusability experiments.
